# Supplementary material for: Prokaryotic community shifts during soil formation on sands in the tundra zone
Source: PLoS One. 2019 Apr 2;14(4):e0206777. doi: 10.1371/journal.pone.0206777 (PMC6445424; doi:10.1371/journal.pone.0206777)
Supplement: S1 Dataset — (XLSX) [file pone.0206777.s004.xlsx]

## Sheet: Лист1
Minimal data set		The values behind the means, standard deviations
The values used to build graphs (Fig2, 3) - the logarithm of the values were calculated and standard deviations were measured for the genes
	Bacterial 16S			Archaeal 16S			Fungal ITS region			nifH			amoA			nirK			nirS
Site I	gene copies/gram	average	standard deviation	gene copies/gram	average	standard deviation	gene copies/gram	average	standard deviation	gene copies/gram	average	standard deviation	gene copies/gram	average	standard deviation	gene copies/gram	average	standard deviation	gene copies/gram	average	standard deviation
US	6.70443e+09	1.30954e+10	8.34775e+09	2.89949e+08	7.855e+08	7.02498e+08	4.42954e+08	6.95122e+08	3.77908e+08	6.6369e+06	1.94136e+07	1.18215e+07	631070	1.02061e+06	501055	5.04209e+08	1.09269e+09	6.17008e+08	3.67394e+06	7.05181e+06	4.80734e+06
US	2.23132e+10			1.99393e+09			3.77281e+08			1.96059e+07			1.58585e+06			1.28877e+09			1.47691e+07
US	5.33483e+09			3.15271e+08			4.85105e+08			9.34586e+06			88234.9			4.01029e+08			3.23281e+06
US	2.19078e+10			5.70433e+08			9.14373e+08			3.50863e+07			6.07362e+06			1.44489e+09			4.95376e+06
US	9.21679e+09			7.57916e+08			1.2559e+09			2.63932e+07			844908			1.82453e+09			8.62947e+06
SF	4.72736e+10	3.61765e+10	1.30568e+10	2.64105e+09	1.57246e+09	6.25304e+08	4.03965e+09	3.88904e+09	7.41535e+08	9.46003e+07	6.30175e+07	1.88361e+07	768940	664872	133883	3.71833e+09	2.34959e+09	9.32608e+08	2.16979e+07	1.71817e+07	3.89664e+06
SF	2.91246e+10			1.26743e+09			4.69989e+09			5.14268e+07			685809			1.44679e+09			1.42125e+07
SF	3.43924e+10			1.10205e+09			2.73038e+09			6.08844e+07			781971			1.59114e+09			1.3151e+07
SF	5.09094e+10			1.60593e+09			4.26817e+09			6.19411e+07			637123			2.78952e+09			2.08926e+07
SF	1.91825e+10			1.24583e+09			3.70711e+09			4.62347e+07			450517			2.20218e+09			1.59546e+07
MS	8.8271e+10	8.6427e+10	5.9922e+10	6.23776e+10	6.09704e+10	2.10518e+10	2.14946e+10	1.31076e+10	4.97441e+09	6.96117e+08	6.90124e+08	1.47565e+08	1.62999e+07	1.95577e+07	2.82783e+06	3.37363e+10	3.7539e+10	6.91862e+09	4.08197e+08	3.14626e+08	6.97837e+07
MS	4.97043e+10			4.74476e+10			1.11734e+10			7.26351e+08			1.81044e+07			3.21454e+10			2.74064e+08
MS	4.93286e+10			9.18966e+10			1.36098e+10			9.05324e+08			2.18256e+07			4.88117e+10			3.68409e+08
MS	5.51697e+10			3.64899e+10			9.15172e+09			5.05247e+08			1.84199e+07			3.95579e+10			2.45678e+08
MS	1.89661e+11			6.66405e+10			1.01085e+10			6.17582e+08			2.31386e+07			3.34439e+10			2.76785e+08
	Bacterial 16S			Archaeal 16S			Fungal ITS region			nifH			amoA			nirK			nirS
Site II	gene copies/gram	average	standard deviation	gene copies/gram	average	standard deviation	gene copies/gram	average	standard deviation	gene copies/gram	average	standard deviation	gene copies/gram	average	standard deviation	gene copies/gram	average	standard deviation	gene copies/gram	average	standard deviation
US	8.39998e+08	1.87185e+09	1.33011e+09	8.09575e+07	1.23013e+08	8.87292e+07	1.14704e+08	1.69916e+08	7.46115e+07	2.4904e+06	3.60017e+06	1.91984e+06	29300.1	57278.6	36658.7	5.30577e+07	9.3277e+07	5.67652e+07	868578	1.60909e+06	1.28767e+06
US	3.80089e+09			2.64445e+08			2.38633e+08			5.2098e+06			63946			1.43917e+08			1.78477e+06
US	2.345e+09			1.40854e+08			2.29318e+08			3.71285e+06			100964			1.45626e+08			1.34272e+06
US	1.93773e+09			9.99845e+07			1.97924e+08			5.60909e+06			80656.7			1.06596e+08			3.70349e+06
US	4.35645e+08			2.88256e+07			6.90001e+07			978678			11526.4			1.7189e+07			345904
SF	1.73109e+11	7.11823e+10	5.70439e+10	4.32084e+09	2.34188e+09	1.12057e+09	8.81483e+09	6.69447e+09	3.05162e+09	4.24782e+08	1.62715e+08	1.48615e+08	1.48586e+06	932187	538986	9.28971e+09	4.77074e+09	2.64618e+09	2.85323e+07	2.01777e+07	4.84787e+06
SF	4.72931e+10			1.95974e+09			8.85252e+09			1.24164e+08			1.47404e+06			3.62846e+09			1.73477e+07
SF	4.30877e+10			1.53854e+09			8.89489e+09			7.53258e+07			720013			3.36043e+09			1.92607e+07
SF	4.93532e+10			1.93486e+09			4.51963e+09			1.19934e+08			238826			4.87406e+09			1.94135e+07
SF	4.30684e+10			1.95541e+09			2.39046e+09			6.93689e+07			742196			2.70106e+09			1.6334e+07
MS	1.23905e+11	1.51405e+11	4.97405e+10	1.24166e+10	9.7608e+09	2.03261e+09	2.15196e+10	1.25782e+10	5.48274e+09	3.9041e+08	4.66454e+08	1.51853e+08	1.56389e+07	1.23029e+07	3.80685e+06	1.06881e+10	1.22561e+10	3.42471e+09	9.14497e+07	9.0309e+07	2.29762e+07
MS	1.23716e+11			1.02816e+10			1.08937e+10			7.35507e+08			1.55334e+07			1.61789e+10			1.19935e+08
MS	2.38945e+11			6.73215e+09			6.70391e+09			4.33025e+08			7.61585e+06			8.09111e+09			5.89202e+07
MS	1.25558e+11			9.78192e+09			1.08885e+10			3.97033e+08			8.8464e+06			1.09159e+10			1.01737e+08
MS	1.44899e+11			9.59179e+09			1.28853e+10			3.76294e+08			1.38801e+07			1.54063e+10			7.9503e+07
